# Supplementary material
Source: HighWire-hosted journal article supplement (http://jmg.bmjjournals.com/highwire/filestream/189350/field_highwire_adjunct_files/2/jmg-2023-109645supp003_data_supplement.pdf)
Supplement: jmg-2023-109645supp003_data_supplement.pdf [file jmg-2023-109645supp003_data_supplement.pdf]

Supplementary Table 1: Current CStAG Membership and representation across the UK GLHs

| Genomic Laboratory Hub (GLH) | Number of CStAG Representatives |
|------------------------------|---------------------------------|
| Central and South GLH        | 1                               |
| East GLH                     | 2                               |
| North West GLH               | 1                               |
| North Thames GLH             | 2                               |
| South East GLH               | 2                               |
| South West GLH               | 0                               |
| North East and Yorkshire GLH | 2                               |
| N/A - Ireland (Dublin)       | 1                               |

**Supplementary Table 2:** Full response breakdown for the 18 questions pertaining to laboratory workflows. To preserve anonymity, free-text comments are not provided.

| Question |                                                                                                                                                                | Options                                                                                                                                                                                                                                                           | Number of Responses                                  |
|----------|----------------------------------------------------------------------------------------------------------------------------------------------------------------|-------------------------------------------------------------------------------------------------------------------------------------------------------------------------------------------------------------------------------------------------------------------|------------------------------------------------------|
| 1        | Which of the following identifiers are present against a detected variant in the output of your NGS pipeline (VCF file and derived files)?                     | Hospital Trust ID<br>NHS Number<br>DOB<br>Sample ID (not present in LIMs)<br>Patient Name<br>Patient Initials<br>Run/NGS ID (not present in LIMs)<br>Sex/Gender<br>Run/NGS ID (that is also present in LIMs)<br>Sample ID (that is also present in LIMs)<br>Other | 0<br>0<br>0<br>2<br>3<br>3<br>5<br>5<br>9<br>15<br>3 |
| 2        | How are the QC'ed small variants (eg SNVs and indels) from your NGS pipeline outputs (VCF or VCF-derived file) CURRENTLY transferred to your LIMs?             | Saved in separate location<br>Attached as separate file<br>Manual copy-and-paste<br>Automatic and invisible (no action required from scientist)<br>Manually typed out<br>Predesigned 'push-button' transfer<br>Other                                              | 2<br>1<br>4<br>0<br>8<br>2<br>0                      |
| 3        | For small variants: How many types/tiers of VCF-derived files do you generate?                                                                                 | >3<br>3<br>2<br>1<br>0                                                                                                                                                                                                                                            | 0<br>2<br>4<br>10<br>1                               |
| 4        | For small variants: How many types/tiers of VCF-derived files do you store?                                                                                    | >3<br>3<br>2<br>1<br>0                                                                                                                                                                                                                                            | 0<br>1<br>1<br>13<br>2                               |
| 5        | How are the QC'ed CNVs (eg exon-level deletion) from your pipeline outputs (from VCF, VCF-derived or MLPA workflow output) CURRENTLY transferred to your LIMs? | Saved in separate location<br>Attached as separate file<br>Manual copy-and-paste<br>Automatic and invisible (no action required from scientist)<br>Manually typed out<br>Predesigned 'push-button' transfer<br>Other                                              | 2<br>1<br>4<br>0<br>9<br>1<br>0                      |
| 6        | For CNVs: How many types/tiers of VCF-derived                                                                                                                  | >3                                                                                                                                                                                                                                                                | 0                                                    |

|    |                                                                                                                                                                                                                                                                                                                                                                               |                                                                                                                                                                                                                                                                                                                                                                                                                                                                                                                                                                                                                                                                                                                                                                                                                                                                                                          |                            |
|----|-------------------------------------------------------------------------------------------------------------------------------------------------------------------------------------------------------------------------------------------------------------------------------------------------------------------------------------------------------------------------------|----------------------------------------------------------------------------------------------------------------------------------------------------------------------------------------------------------------------------------------------------------------------------------------------------------------------------------------------------------------------------------------------------------------------------------------------------------------------------------------------------------------------------------------------------------------------------------------------------------------------------------------------------------------------------------------------------------------------------------------------------------------------------------------------------------------------------------------------------------------------------------------------------------|----------------------------|
|    | files do you generate?                                                                                                                                                                                                                                                                                                                                                        | 3<br>2<br>1<br>0                                                                                                                                                                                                                                                                                                                                                                                                                                                                                                                                                                                                                                                                                                                                                                                                                                                                                         | 1<br>0<br>15<br>1          |
| 7  | For CNVs: How many types/tiers of VCF-derived files do you store?                                                                                                                                                                                                                                                                                                             | >3<br>3<br>2<br>1<br>0                                                                                                                                                                                                                                                                                                                                                                                                                                                                                                                                                                                                                                                                                                                                                                                                                                                                                   | 0<br>1<br>0<br>14<br>2     |
| 8  | What best describes the way CSG small variants are CURRENTLY stored on your LIMs?                                                                                                                                                                                                                                                                                             | In a single free text/unstructured field (which also includes additional clinical report wording)<br>In a single free text/unstructured field (just contains variant name)<br>As a single field of strict formal hgvs notation, ie: gene + transcript + genomic location + coding (c.) change + protein (p.) change<br>As separate fields for gene/transcript/genomic location/coding (c.) change/protein (p.) change<br>Stored outside of a LIMs system                                                                                                                                                                                                                                                                                                                                                                                                                                                 | 5<br>5<br>2<br>4<br>1      |
| 9  | What best describes the way CSG CNVs are CURRENTLY stored on your LIMs?                                                                                                                                                                                                                                                                                                       | In a single free text/unstructured field (which also includes additional clinical report wording)<br>In a single free text/unstructured field (just contains variant name)<br>As a single field of strict formal hgvs notation, ie: gene + transcript + genomic location + coding (c.) change + protein (p.) change<br>As separate fields for gene/transcript/genomic location/coding (c.) change/protein (p.) change<br>Stored outside of a LIMs system                                                                                                                                                                                                                                                                                                                                                                                                                                                 | 4<br>9<br>1<br>2<br>1      |
| 10 | Which CSG variants are CURRENTLY stored in your LIMs?                                                                                                                                                                                                                                                                                                                         | All variants detected (rare and common)<br>All rare variants detected (all class 3 and above, may also include rare class 1/2)<br>All rare variants detected (all class 3 and above, no rare class 1/2)<br>Most rare variants of relevance (all 4/5 and most interesting VUS)<br>Only variants included in the clinical report<br>No variants stored in the LIMs / No LIMs system                                                                                                                                                                                                                                                                                                                                                                                                                                                                                                                        | 3<br>2<br>2<br>5<br>4<br>1 |
| 11 | In the event of a variant re-classification (for example, up-classification of a previous cold class 3), how confidently/readily could you identify all patients in whom that variant had been identified (since inception of your current system)? (if not using a LIMs system for this process, please specify which system would instead be used to identify all patients) | 5: extremely: all variants are stored in LIMs/current storage system in accurate structured format<br>4: very: all variants are stored in LIMs/current storage system but have been manually entered, so subject to typos<br>3: quite: cold class 3 variant likely not in LIMs/current storage system. Would require a comprehensive search of various historic bioinformatics systems/VCFs/derived files but these are stored so as to be easily searchable<br>2: not very: cold class 3 variant likely not in LIMs/current storage system. Would require a comprehensive search of various historic bioinformatics systems/VCFs/derived files which are stored in multiple locations<br>1: poorly: cold class 3 variant likely not in LIMs/current storage system. Would require a comprehensive search of various historic bioinformatics systems/VCFs/derived files which are not readily accessible | 5<br>8<br>3<br>1<br>0      |
| 12 | From what type of interface are the variants requiring interpretation viewed?                                                                                                                                                                                                                                                                                                 | Within a bioinformatics processing system/dedicated in-house variant system<br>In a spreadsheet (eg VCF, VCF-derived file.)<br>Other (please specify)                                                                                                                                                                                                                                                                                                                                                                                                                                                                                                                                                                                                                                                                                                                                                    | 8<br>5<br>4                |
| 13 | Within the interface from which you view variants requiring interpretation, which description is most accurate?                                                                                                                                                                                                                                                               | Most/many of the relevant data sources have been pre-imported<br>There are variant-specific hyperlinks to most/many of the relevant data sources.<br>No/minimal annotations (eg only population frequencies). Accessing of relevant data sources (Alamut, CanVar-UK, ClinVar, literature) requires manual interrogation (variant name is typed/pasted in).                                                                                                                                                                                                                                                                                                                                                                                                                                                                                                                                               | 1<br>7<br>9                |

|    |                                                                                                                                                                                                   |                                                                                                                                                 |    |
|----|---------------------------------------------------------------------------------------------------------------------------------------------------------------------------------------------------|-------------------------------------------------------------------------------------------------------------------------------------------------|----|
|    |                                                                                                                                                                                                   | Other                                                                                                                                           | 0  |
| 14 | Following interpretation of a CSG variant, where do you store your updated detailed findings/pathogenicity classification (eg scoring on ACMG sub-elements)?                                      | Dedicated in-house departmental variant datasystem                                                                                              | 5  |
|    |                                                                                                                                                                                                   | Individual per-VARIANT files (excel, word, other document). Updated for recurrent viewings of variant.                                          | 5  |
|    |                                                                                                                                                                                                   | Individual per-VARIANT files (excel, word, other document). New file time a variant is encountered.                                             | 4  |
|    |                                                                                                                                                                                                   | Individual per-PATIENT EPISODE files (excel, word, other document) (may contain multiple variants)                                              | 4  |
|    |                                                                                                                                                                                                   | Commercial platform or software (eg Congenica, Alamut)                                                                                          | 4  |
|    |                                                                                                                                                                                                   | LIMs (against specific patient)                                                                                                                 | 3  |
|    |                                                                                                                                                                                                   | Individual per-GENE files (excel, word, other document).                                                                                        | 1  |
|    |                                                                                                                                                                                                   | Individual per-DISEASE files (excel, word, other document).                                                                                     | 1  |
|    |                                                                                                                                                                                                   | LIMs (against variant)                                                                                                                          | 0  |
|    |                                                                                                                                                                                                   | Dedicated single departmental excel/spreadsheet                                                                                                 | 0  |
|    |                                                                                                                                                                                                   | Variant classifications are only documented on the patient report and not elsewhere stored                                                      | 0  |
|    |                                                                                                                                                                                                   | Other (please specify)                                                                                                                          | 0  |
| 15 | How did you capture test context information in your laboratory patient-level datastorage system (LIMs) prior to the GMS test directory?                                                          | Clinical details/Phenotype information from test request or referral form                                                                       | 10 |
|    |                                                                                                                                                                                                   | Test/panel requested                                                                                                                            | 15 |
|    |                                                                                                                                                                                                   | None                                                                                                                                            | 1  |
|    |                                                                                                                                                                                                   | Other (please specify)                                                                                                                          | 1  |
| 16 | How do you capture test context information in your laboratory patient-level datastorage system (LIMs) since the GMS test directory implemented?                                                  | Clinical details/Phenotype information from test request form or referral form                                                                  | 11 |
|    |                                                                                                                                                                                                   | Test/panel requested                                                                                                                            | 14 |
|    |                                                                                                                                                                                                   | Test indication R number (since publication of the National Genomic Test Directory)                                                             | 12 |
|    |                                                                                                                                                                                                   | None                                                                                                                                            | 0  |
|    |                                                                                                                                                                                                   | Other (please specify)                                                                                                                          | 1  |
| 17 | Following implementation of the GMS test directory, please estimate what % of CSG test requests now contain some clinical details/phenotype information (in addition to test requested/R number). | 0-24%                                                                                                                                           | 0  |
|    |                                                                                                                                                                                                   | 25-49%                                                                                                                                          | 2  |
|    |                                                                                                                                                                                                   | 50-74%                                                                                                                                          | 8  |
|    |                                                                                                                                                                                                   | 75-100%                                                                                                                                         | 6  |
| 18 | When a single gene/small gene set is reported from a larger panel/exome, how is the gene set which is analysed captured in your LIMs?                                                             | Genes analysed are listed by name in LIMs against patient (free text entry eg list with commas)                                                 | 4  |
|    |                                                                                                                                                                                                   | Name of subpanel(s) listed in LIMs against patient (structured entry)                                                                           | 4  |
|    |                                                                                                                                                                                                   | Genes analysed are listed by name in LIMs against patient (structured entry eg selected from a drop-down list, imported from a separate portal) | 2  |
|    |                                                                                                                                                                                                   | Name of subpanel(s) listed in LIMs against patient (free text entry)                                                                            | 2  |
|    |                                                                                                                                                                                                   | Mixture of genes and subpanels (free text entry)                                                                                                | 2  |
|    |                                                                                                                                                                                                   | Genes/panels analysed not documented in LIMs; requires reference to other files within NGS workflow                                             | 1  |
|    |                                                                                                                                                                                                   | Exported as a list from commercial platform and attached to LIMs record                                                                         | 1  |
|    |                                                                                                                                                                                                   | Other (please specify)                                                                                                                          | 1  |
